# Supplementary material
Source: PubMed Central journal article supplement (PMC3192435)
Supplement: NIHMS320178-supplement-2.pdf [file NIHMS320178-supplement-2.pdf]

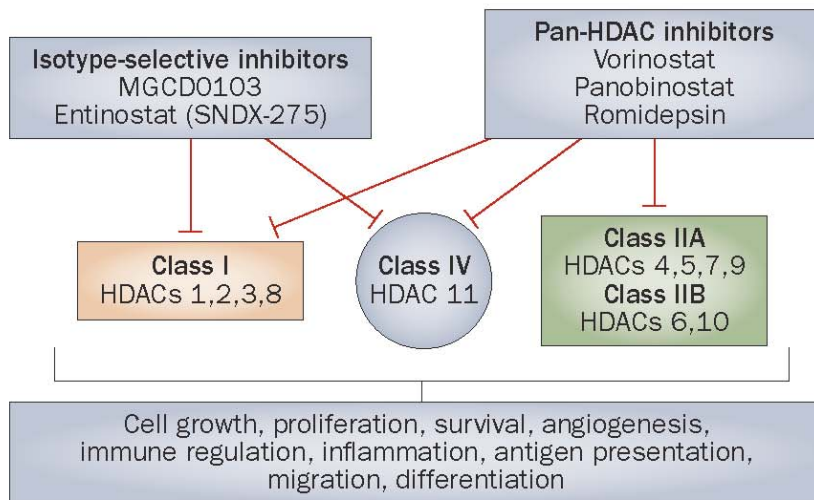

**Supplementary Figure 1** | Rationale for targeting histone deacetylases (HDACs) in cancer. Both pan-HDAC inhibitors and isotype-selective inhibitors have demonstrated promising clinical activity in a variety of lymphomas.
